# Supplementary material
Source: Research Square preprint supplement (doi:10.21203/rs.3.rs-9189274/v1)
Supplement: Supplementary file 1 [file 2569d374b9c9761bd0ed25c1.docx]

Table 8 Optimum mix ratio control design

| type | fly ash content | slag powder content | defoamer content |
| --- | --- | --- | --- |
| predicted value | 10.45% | 10.51% | 0.525% |
| H0 | 10% | 10% | 0.50% |
| error | 4.3% | 4.8% | 4.761% |
| H1 | 10% | 0 | 0 |
| H2 | 0 | 10% | 0 |
| H3 | 0 | 0 | 0.50% |
| H4 | 0 | 0 | 0 |

Effect of Temperature on Pore Structure and Mechanical Properties of Concrete

Curing Experiment at Low Temperature of 0°C

3d compressive strength and splitting tensile strength

| type | compressive strength/MPa | splitting strength/MPa |
| --- | --- | --- |
| H0 | 50.4 | 2.89 |
| H1 | 45.6 | 2.8 |
| H2 | 49.9 | 2.45 |
| H3 | 40.3 | 2.5 |
| H4 | 42.8 | 2.7 |

7d compressive strength and splitting tensile strength

| type | compressive strength/MPa | splitting strength/MPa |
| --- | --- | --- |
| H0 | 56.1 | 3.1 |
| H1 | 47.7 | 3.0 |
| H2 | 52.6 | 3.3 |
| H3 | 50.1 | 2.3 |
| H4 | 53.5 | 3.1 |

14d compressive strength and splitting tensile strength

| type | compressive strength/MPa | splitting strength/MPa |
| --- | --- | --- |
| H0 | 59.8 | 3.2 |
| H1 | 52.5 | 3.1 |
| H2 | 54.6 | 3.4 |
| H3 | 53.45 | 2.5 |
| H4 | 55.5 | 3.5 |

28d compressive strength and splitting tensile strength

| type | compressive strength/MPa | splitting strength/MPa |
| --- | --- | --- |
| H0 | 68.8 | 4.1 |
| H1 | 61.5 | 3.6 |
| H2 | 62.6 | 3.5 |
| H3 | 58.7 | 3.1 |
| H4 | 66.5 | 3.7 |

Curing Experiment at High Temperature of 40°C

3d compressive strength and splitting tensile strength

| type | compressive strength/MPa | splitting strength/MPa |
| --- | --- | --- |
| H0 | 43.6 | 2.89 |
| H1 | 45.6 | 2.8 |
| H2 | 46.9 | 2.45 |
| H3 | 45.1 | 2.36 |
| H4 | 48.6 | 3.1 |

7d compressive strength and splitting tensile strength

| type | compressive strength/MPa | splitting strength/MPa |
| --- | --- | --- |
| H0 | 50.1 | 3.1 |
| H1 | 51.6 | 3.0 |
| H2 | 52.6 | 2.89 |
| H3 | 51.9 | 2.65 |
| H4 | 55.4 | 3.35 |

14d compressive strength and splitting tensile strength

| type | compressive strength/MPa | splitting strength/MPa |
| --- | --- | --- |
| H0 | 57.12 | 3.3 |
| H1 | 59.6 | 3.05 |
| H2 | 58.5 | 3.25 |
| H3 | 58.1 | 2.89 |
| H4 | 59.5 | 3.42 |

28d compressive strength and splitting tensile strength

| type | compressive strength/MPa | splitting strength/MPa |
| --- | --- | --- |
| H0 | 63.6 | 3.55 |
| H1 | 63.35 | 3.15 |
| H2 | 60.9 | 3.3 |
| H3 | 61.2 | 3.11 |
| H4 | 62.3 | 3.56 |

experimental group with water curing

| type | fly ash content | slag powder content | defoamer content |
| --- | --- | --- | --- |
| H0 | 10% | 10% | 0.50% |
| H1 | 10% | 0 | 0 |
| H2 | 0 | 10% | 0 |
| H3 | 0 | 0 | 0.50% |
| H4 | 0 | 0 | 0 |

3d compressive strength and splitting tensile strength

| type | compressive strength/MPa | splitting strength/MPa |
| --- | --- | --- |
| H0 | 41.6 | 2.52 |
| H1 | 43.6 | 2.6 |
| H2 | 42.5 | 2.15 |
| H3 | 43.5 | 2.16 |
| H4 | 46.6 | 3.3 |

7d compressive strength and splitting tensile strength

| type | compressive strength/MPa | splitting strength/MPa |
| --- | --- | --- |
| H0 | 56.6 | 3.05 |
| H1 | 57.1 | 3.15 |
| H2 | 59.5 | 3.1 |
| H3 | 61.1 | 3.1 |
| H4 | 60.5 | 3.15 |

14d compressive strength and splitting tensile strength

| type | compressive strength/MPa | splitting strength/MPa |
| --- | --- | --- |
| H0 | 66.25 | 3.15 |
| H1 | 64.6 | 3.05 |
| H2 | 70.25 | 3.4 |
| H3 | 67.5 | 3.45 |
| H4 | 67.7 | 3.25 |

28d compressive strength and splitting tensile strength

| type | compressive strength/MPa | splitting strength/MPa |
| --- | --- | --- |
| H0 | 69.3 | 4.7 |
| H1 | 61.1 | 3.9 |
| H2 | 63.5 | 3.8 |
| H3 | 64.6 | 3.6 |
| H4 | 66.8 | 3.7 |

film-cured experimental group

| type | fly ash content | slag powder content | defoamer content |
| --- | --- | --- | --- |
| H0 | 10% | 10% | 0.50% |
| H1 | 10% | 0 | 0 |
| H2 | 0 | 10% | 0 |
| H3 | 0 | 0 | 0.50% |
| H4 | 0 | 0 | 0 |

3d compressive strength and splitting tensile strength

| type | compressive strength/MPa | splitting strength/MPa |
| --- | --- | --- |
| H0 | 43.2 | 2.22 |
| H1 | 44.7 | 2.1 |
| H2 | 42.1 | 2.25 |
| H3 | 41.3 | 2.17 |
| H4 | 46.9 | 2.6 |

7d compressive strength and splitting tensile strength

| type | compressive strength/MPa | splitting strength/MPa |
| --- | --- | --- |
| H0 | 50.3 | 3.7 |
| H1 | 50.1 | 3.5 |
| H2 | 45.4 | 2.9 |
| H3 | 46.2 | 3.0 |
| H4 | 52.5 | 2.7 |

14d compressive strength and splitting tensile strength

| type | compressive strength/MPa | splitting strength/MPa |
| --- | --- | --- |
| H0 | 55.8 | 4.0 |
| H1 | 52.5 | 3.8 |
| H2 | 51.6 | 3.25 |
| H3 | 58.9 | 3.54 |
| H4 | 57.4 | 3.2 |

28d compressive strength and splitting tensile strength

| type | compressive strength/MPa | splitting strength/MPa |
| --- | --- | --- |
| H0 | 60.1 | 4.5 |
| H1 | 57.7 | 3.8 |
| H2 | 56.9 | 2.5 |
| H3 | 66.9 | 3.85 |
| H4 | 63.5 | 3.75 |

standard-cured experimental group

3d compressive strength and splitting tensile strength

| type | compressive strength/MPa | splitting strength/MPa |
| --- | --- | --- |
| H0 | 43.6 | 2.89 |
| H1 | 45.6 | 2.8 |
| H2 | 46.9 | 2.45 |
| H3 | 47.1 | 2.5 |
| H4 | 49.6 | 2.8 |

7d compressive strength and splitting tensile strength

| type | compressive strength/MPa | splitting strength/MPa |
| --- | --- | --- |
| H0 | 51.75 | 3.2 |
| H1 | 49.2 | 3.2 |
| H2 | 53.6 | 3.0 |
| H3 | 55.7 | 4.1 |
| H4 | 57.4 | 3.3 |

14d compressive strength and splitting tensile strength

| type | compressive strength/MPa | splitting strength/MPa |
| --- | --- | --- |
| H0 | 58.6 | 4.0 |
| H1 | 58.6 | 3.7 |
| H2 | 60.2 | 3.5 |
| H3 | 60.5 | 3.7 |
| H4 | 61.1 | 3.7 |

28d compressive strength and splitting tensile strength

| type | compressive strength/MPa | splitting strength/MPa |
| --- | --- | --- |
| H0 | 63.5 | 4.1 |
| H1 | 61.3 | 3.75 |
| H2 | 63.2 | 3.66 |
| H3 | 63.7 | 3.8 |
| H4 | 64.4 | 3.9 |

All data generated or analyzed during this study are included in this published article [and its supplementary information files].

The raw data are published with the consent of all authors.
